# Supplementary material
Source: Springer Nature journal article supplement (https://www.springermedizin.de/resource/supplementary/13102_2013_45_MOESM3_ESM.pdf/9686484)

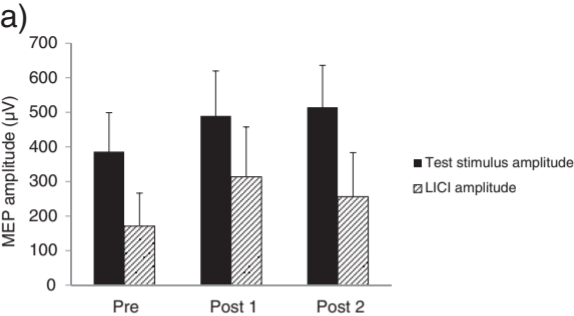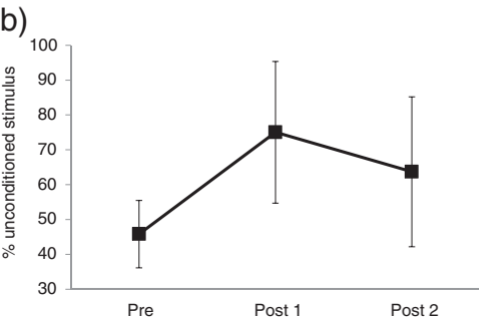

Supplement: MOESM3 [file 9686484]
